# Supplementary material for: Comparative Multivariate Analysis of Codon and Amino Acid Usage in Three Leishmania Genomes
Source: PubMed Central journal article supplement — Genomics Proteomics Bioinformatics. 2012 Jan 28;9(6):218–28. doi: 10.1016/S1672-0229(11)60025-9 (PMC5054167; doi:10.1016/s1672-0229(11)60025-9), 2012-01-28
Supplement: mmc1.pdf [file mmc1.pdf]

## Supplementary Material

Chauhan, N., *et al.* 2011. Comparative multivariate analysis of codon and amino acid usage in three *Leishmania* genomes. *Genomics Proteomics Bioinformatics* 9(6): 218-228.

DOI: 10.1016/S1672-0229(11)60025-9

Tables S1 and S2; Figures S1

**Table S1 RSCU values of different groups of genes of *L. donovani*, *L. infantum* and *L. major***

| Amino acid | Codon | <i>L. donovani</i>      |                   | <i>L. infantum</i>      |                   | <i>L. major</i>         |                   |
|------------|-------|-------------------------|-------------------|-------------------------|-------------------|-------------------------|-------------------|
|            |       | HEG <sup>a</sup>        | LEG <sup>a</sup>  | HEG <sup>a</sup>        | LEG <sup>a</sup>  | HEG <sup>a</sup>        | LEG <sup>a</sup>  |
| Phe        | UUU   | 0.19                    | 1.76 <sup>c</sup> | 0.28                    | 1.11 <sup>c</sup> | 0.26                    | 1.13 <sup>c</sup> |
|            | UUC   | <b>1.81<sup>b</sup></b> | 0.24              | <b>1.72<sup>b</sup></b> | 0.89              | <b>1.74<sup>b</sup></b> | 0.87              |
| Tyr        | UAU   | 0.05                    | 1.59 <sup>c</sup> | 0.11                    | 0.61 <sup>c</sup> | 0.09                    | 0.73 <sup>c</sup> |
|            | UAC   | <b>1.95<sup>b</sup></b> | 0.41              | <b>1.89<sup>b</sup></b> | 1.39              | <b>1.91<sup>b</sup></b> | 1.27              |
| His        | CAU   | 0.13                    | 1.44 <sup>c</sup> | 0.2                     | 0.71 <sup>c</sup> | 0.16                    | 0.70 <sup>c</sup> |
|            | CAC   | <b>1.88<sup>b</sup></b> | 0.56              | <b>1.8<sup>b</sup></b>  | 1.29              | <b>1.84<sup>b</sup></b> | 1.3               |
| Gln        | CAA   | 0.04                    | 1.47 <sup>c</sup> | 0.07                    | 0.64 <sup>c</sup> | 0.06                    | 0.67 <sup>c</sup> |
|            | CAG   | <b>1.96<sup>b</sup></b> | 0.53              | <b>1.93<sup>b</sup></b> | 1.36              | <b>1.94<sup>b</sup></b> | 1.33              |
| Asn        | AAU   | 0.09                    | 1.48 <sup>c</sup> | 0.15                    | 0.73 <sup>c</sup> | 0.12                    | 0.77 <sup>c</sup> |
|            | AAC   | <b>1.91<sup>b</sup></b> | 0.52              | <b>1.85<sup>b</sup></b> | 1.27              | <b>1.88<sup>b</sup></b> | 1.23              |
| Lys        | AAA   | 0.02                    | 1.54 <sup>c</sup> | 0.08                    | 0.65 <sup>c</sup> | 0.05                    | 0.68 <sup>c</sup> |
|            | AAG   | <b>1.98<sup>b</sup></b> | 0.46              | <b>1.92<sup>b</sup></b> | 1.35              | <b>1.95<sup>b</sup></b> | 1.32              |
| Asp        | GAU   | 0.43                    | 1.34 <sup>c</sup> | 0.39                    | 0.84 <sup>c</sup> | 0.35                    | 0.90 <sup>c</sup> |
|            | GAC   | <b>1.57<sup>b</sup></b> | 0.66              | <b>1.61<sup>b</sup></b> | 1.16              | <b>1.65<sup>b</sup></b> | 1.1               |
| Glu        | GAA   | 0.07                    | 1.36 <sup>c</sup> | 0.15                    | 0.66 <sup>c</sup> | 0.1                     | 0.67 <sup>c</sup> |
|            | GAG   | <b>1.93<sup>b</sup></b> | 0.64              | <b>1.85<sup>b</sup></b> | 1.34              | <b>1.9<sup>b</sup></b>  | 1.33              |
| Cys        | UGU   | 0.09                    | 1.33 <sup>c</sup> | 0.11                    | 0.68 <sup>c</sup> | 0.11                    | 0.69 <sup>c</sup> |
|            | UGC   | <b>1.91<sup>b</sup></b> | 0.67              | <b>1.89<sup>b</sup></b> | 1.32              | <b>1.89<sup>b</sup></b> | 1.31              |
| Ile        | AUU   | 0.44                    | 1.48 <sup>c</sup> | 0.54                    | 1.28 <sup>c</sup> | 0.44                    | 1.28 <sup>c</sup> |
|            | AUC   | <b>2.54<sup>b</sup></b> | 0.17              | <b>2.39<sup>b</sup></b> | 1.27              | <b>2.51<sup>b</sup></b> | 1.19              |
|            | AUA   | 0.02                    | 1.35 <sup>c</sup> | 0.07                    | 0.45 <sup>c</sup> | 0.05                    | 0.53 <sup>c</sup> |
| Gly        | GGU   | 0.86                    | 1.07 <sup>c</sup> | 0.67                    | 0.86 <sup>c</sup> | 0.71                    | 0.99 <sup>c</sup> |
|            | GGC   | <b>2.91<sup>b</sup></b> | 0.97              | <b>2.89<sup>b</sup></b> | 1.57              | <b>2.89<sup>b</sup></b> | 1.45              |
|            | GGA   | 0.08                    | 1.31 <sup>c</sup> | 0.1                     | 0.71 <sup>c</sup> | 0.08                    | 0.74 <sup>c</sup> |
|            | GGG   | 0.15                    | 0.66 <sup>c</sup> | 0.35                    | 0.87 <sup>c</sup> | 0.32                    | 0.81 <sup>c</sup> |
| Val        | GUU   | 0.29                    | 1.45 <sup>c</sup> | 0.23                    | 0.85 <sup>c</sup> | 0.31                    | 0.84 <sup>c</sup> |
|            | GUC   | 0.72 <sup>b</sup>       | 0.45              | 1.7 <sup>b</sup>        | 0.96              | 0.9                     | 0.95              |
|            | GUA   | 0.07                    | 1.14 <sup>c</sup> | 0.08                    | 0.51 <sup>c</sup> | 0.08                    | 0.54 <sup>c</sup> |
|            | GUG   | <b>2.92<sup>b</sup></b> | 0.95              | <b>1.99<sup>b</sup></b> | 1.68              | <b>2.71</b>             | 1.67              |
| Pro        | CCU   | 0.19                    | 1.14 <sup>c</sup> | 0.37                    | 0.94 <sup>c</sup> | 0.28                    | 0.94 <sup>c</sup> |
|            | CCC   | 1.2*                    | 0.87              | 0.96 <sup>b</sup>       | 0.79              | 0.98 <sup>b</sup>       | 0.76              |
|            | CCA   | 0.08                    | 0.99 <sup>c</sup> | 0.27                    | 0.96 <sup>c</sup> | 0.16                    | 0.98 <sup>c</sup> |
|            | CCG   | <b>2.53<sup>b</sup></b> | 1                 | <b>2.4<sup>b</sup></b>  | 1.31              | <b>2.58<sup>b</sup></b> | 1.31              |

(to be continued on the next page)

Table S1 (Continued)

| Amino acid | Codon | <i>L. donovani</i>      |                   | <i>L. infantum</i>      |                   | <i>L. major</i>         |                   |
|------------|-------|-------------------------|-------------------|-------------------------|-------------------|-------------------------|-------------------|
|            |       | HEG <sup>a</sup>        | LEG <sup>a</sup>  | HEG <sup>a</sup>        | LEG <sup>a</sup>  | HEG <sup>a</sup>        | LEG <sup>a</sup>  |
| Thr        | ACU   | 0.3                     | 1.66 <sup>c</sup> | 0.25                    | 0.78 <sup>c</sup> | 0.22                    | 0.75 <sup>c</sup> |
|            | ACC   | 1.4 <sup>b</sup>        | 0.5               | 1.32 <sup>b</sup>       | 0.98              | 1.2 <sup>b</sup>        | 0.9               |
|            | ACA   | 0.09                    | 1.16 <sup>c</sup> | 0.25                    | 0.99 <sup>c</sup> | 0.22                    | 1.17 <sup>c</sup> |
|            | ACG   | <b>2.21<sup>b</sup></b> | 0.69              | <b>2.18<sup>b</sup></b> | 1.25              | <b>2.37<sup>b</sup></b> | 1.18              |
| Ala        | GCU   | 0.44                    | 1.20 <sup>c</sup> | 0.41                    | 0.86 <sup>c</sup> | 0.45                    | 0.88 <sup>c</sup> |
|            | GCC   | <b>1.59<sup>b</sup></b> | 0.54              | <b>1.74<sup>b</sup></b> | 0.97              | <b>1.45<sup>b</sup></b> | 0.95              |
|            | GCA   | 0.08                    | 1.34 <sup>c</sup> | 0.2                     | 0.92 <sup>c</sup> | 0.15                    | 0.99 <sup>c</sup> |
|            | GCG   | <b>1.89<sup>b</sup></b> | 0.92              | <b>1.65<sup>b</sup></b> | 1.26              | <b>1.95<sup>b</sup></b> | 1.17              |
| Ser        | UCU   | 0.62                    | 1.28 <sup>c</sup> | 0.49                    | 0.99 <sup>c</sup> | 0.53                    | 1.05 <sup>c</sup> |
|            | UCC   | <b>1.87<sup>b</sup></b> | 0.63              | <b>1.36<sup>b</sup></b> | 0.91              | <b>1.64<sup>b</sup></b> | 0.86              |
|            | UCA   | 0.03                    | 1.16 <sup>c</sup> | 0.12                    | 0.79 <sup>c</sup> | 0.08                    | 0.81 <sup>c</sup> |
|            | UCG   | <b>1.96<sup>b</sup></b> | 0.85              | <b>1.66<sup>b</sup></b> | 1.24              | <b>1.79<sup>b</sup></b> | 1.18              |
|            | AGU   | 0.13                    | 1.47 <sup>c</sup> | 0.18                    | 0.64 <sup>c</sup> | 0.15                    | 0.69 <sup>c</sup> |
|            | AGC   | <b>1.38<sup>b</sup></b> | 0.6               | <b>2.19<sup>b</sup></b> | 1.44              | <b>1.82<sup>b</sup></b> | 1.41              |
| Arg        | CGU   | 0.56                    | 1.17 <sup>c</sup> | 0.58                    | 0.96 <sup>c</sup> | 0.59                    | 1.02 <sup>c</sup> |
|            | CGC   | <b>5.24<sup>b</sup></b> | 0.98              | <b>4.68<sup>b</sup></b> | 1.84              | <b>4.73<sup>b</sup></b> | 1.77              |
|            | CGA   | 0.02                    | 1.40 <sup>c</sup> | 0.07                    | 0.98 <sup>c</sup> | 0.06                    | 0.98 <sup>c</sup> |
|            | CGG   | 0.07                    | 1.05 <sup>c</sup> | 0.44                    | 1.03 <sup>c</sup> | 0.44                    | 1.03 <sup>c</sup> |
|            | AGA   | 0                       | 0.86 <sup>c</sup> | 0.04                    | 0.51 <sup>c</sup> | 0.03                    | 0.53 <sup>c</sup> |
|            | AGG   | 0.12                    | 0.54 <sup>c</sup> | 0.19                    | 0.68 <sup>c</sup> | 0.16                    | 0.68 <sup>c</sup> |
| Leu        | UUA   | 0                       | 2.46 <sup>c</sup> | 0.01                    | 0.24 <sup>c</sup> | 0.01                    | 0.31 <sup>c</sup> |
|            | UUG   | 0.14                    | 1.02 <sup>c</sup> | 0.24                    | 1.03 <sup>c</sup> | 0.2                     | 0.99 <sup>c</sup> |

Note: Codons with bold RSCU values: the codon optimally used by a particular amino acid residue.

<sup>a</sup>HEG and LEG: groups of potential highly expressed genes (HEGs) and lowly expressed genes (LEGs) taken from two extreme ends of Axis 1 of COA of RSCU of genes in the respective species.

<sup>b</sup>Codons with significantly high frequencies in HEG, compared to LEG ( $P < 0.01$ )

<sup>c</sup>Codons with significantly high frequencies in LEG, compared to HEG ( $P < 0.01$ )

\*Highly expressed dataset ( $0.01 < P < 0.05$ ).

**Table S2 GC-content at three codon positions of HEGs and LEGs in three species of *Leishmania***

|                 | HEGs               |                    |                 | LEGs               |                    |                 |
|-----------------|--------------------|--------------------|-----------------|--------------------|--------------------|-----------------|
|                 | <i>L. donovani</i> | <i>L. infantum</i> | <i>L. major</i> | <i>L. donovani</i> | <i>L. infantum</i> | <i>L. major</i> |
| GC              | 0.64               | 0.65               | 0.65            | 0.56               | 0.55               | 0.55            |
| GC <sub>1</sub> | 0.58               | 0.61               | 0.60            | 0.58               | 0.59               | 0.59            |
| GC <sub>2</sub> | 0.43               | 0.43               | 0.43            | 0.56               | 0.46               | 0.45            |
| GC <sub>3</sub> | 0.92               | 0.91               | 0.92            | 0.55               | 0.60               | 0.60            |

Note: GC: overall GC composition; GC<sub>1</sub>: GC composition at the first site of a codon; GC<sub>2</sub>: GC composition at the second site of a codon, and GC<sub>3</sub>: GC composition at the third site of a codon.

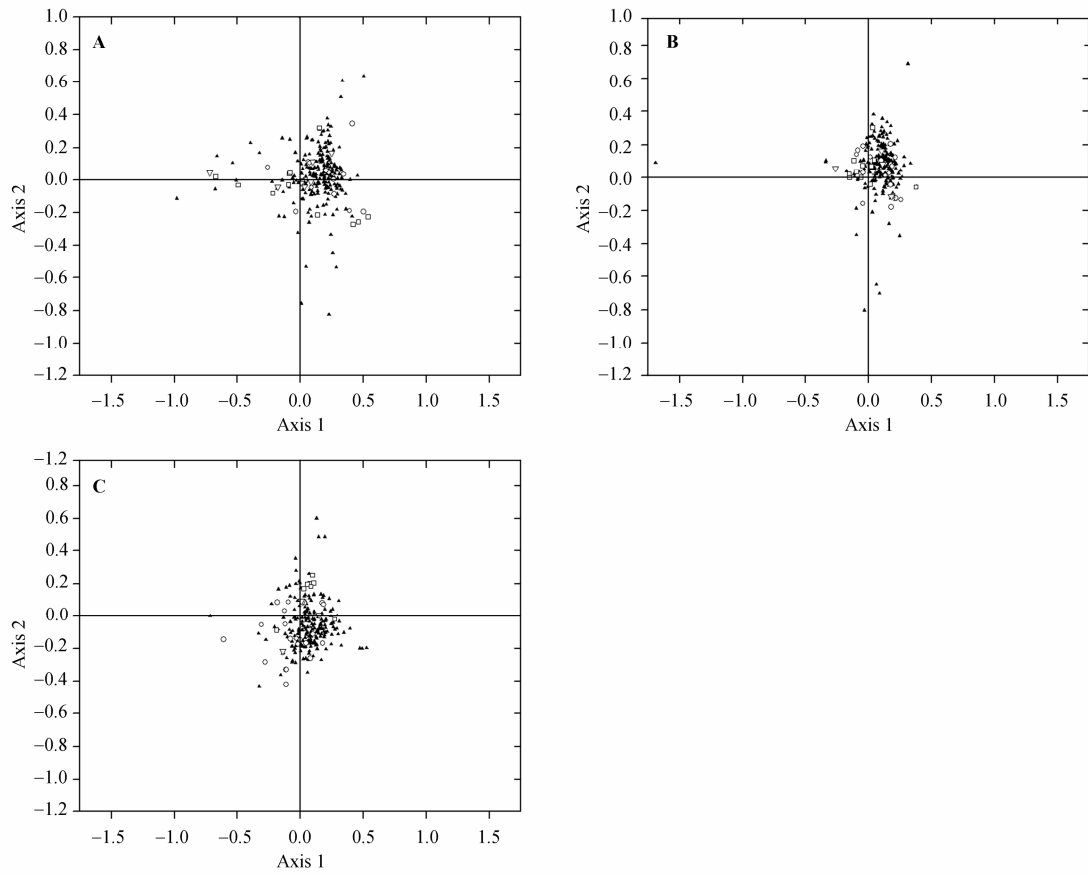

**Figure S1** Position of homologous genes along the two major axes of variation in COA on RAAU. Position of homologous genes along Axis 1 were plotted against Axis 2 by COA on RAAU in *L. donovani* (**A**), *L. infantum* (**B**) and *L. major* (**C**). HEG, VSG and topoisomerase is represented by open circle, square and triangle, respectively. The rest of the genes (LEGs) are indicated by solid triangles.
